# Supplementary material for: Biomechanical regulation of breast cancer metastasis and progression
Source: PubMed Central journal article supplement (PMC8110548; doi:10.1038/s41598-021-89288-z), 2021-05-10
Supplement: 41598_2021_89288_MOESM1_ESM.pdf [file 41598_2021_89288_MOESM1_ESM.pdf]

## Supplemental Materials for

### Biomechanical Regulation of Breast Cancer Metastasis and Progression

Adrienne Spencer<sup>1†</sup>, Andrew D. Sligar<sup>1†</sup>, Daniel Chavarria<sup>1</sup>, Jason Lee<sup>1</sup>, Darshil Choksi<sup>1</sup>,  
Nikita P. Patil<sup>1</sup>, HooWon Lee<sup>1</sup>, Austin P. Veith<sup>1</sup>, William J. Riley<sup>1</sup>, Shubh Desai<sup>1</sup>,  
Ali Abbaspour<sup>1</sup>, Rohan Singeetham<sup>1</sup>, and Aaron B. Baker<sup>1,2,3,4\*</sup>

<sup>1</sup>Department of Biomedical Engineering, University of Texas, Austin, TX

<sup>2</sup>Institute for Cellular and Molecular Biology, University of Texas at Austin, Austin, TX

<sup>3</sup>Institute for Biomaterials, Drug Delivery and Regenerative Medicine, University of Texas at Austin, Austin, TX

<sup>4</sup>Institute for Computational Engineering and Sciences, University of Texas at Austin, Austin, TX

\*Correspondence to:

Aaron B. Baker

University of Texas at Austin

Department of Biomedical Engineering

1 University Station

BME 5.202D, C0800

Austin, TX 78712

Phone: 512-232-7114

E-mail: [abbaker1@gmail.com](mailto:abbaker1@gmail.com)

## Supplemental Figure Legends

**Supplemental Figure 1. Mechanical strain regulates gene expression in functional gene groups.** MDA-MB-231 breast cancer cells were mechanically strained at 0, 7.5 or 15% strain at a frequency of 1 Hz for 24 hours (n = 4). (A) Volcano plots for comparisons between the groups. (B-E) RNA sequencing was performed and gene groups were examined including genes associated with drug metabolism, proliferation, Yap/Zeb transcriptional control, and cell adhesion. \* $p < 0.05$  versus static group. † $p < 0.05$  versus 7.5% strain group. R software was used to create parts of this figure [23].

**Supplemental Figure 2. Mechanical strain reduces metabolic activity in cancer cells.** MDA-MB-231 cells were treated with 7.5% mechanical strain for 24 hours and metabolic activity was measured using an MTT assay.

**Supplemental Figure 3. Mechanical strain reduces growth and enhances chemoresistance of MCF-7 cells.** MCF-7 cells were treated with 7.5% mechanical strain (1 Hz) for 24 hours with treatment with doxorubicin at the indicated amount (n = 13-16). \* $p < 0.05$  versus the static group under treatment with the same concentration of doxorubicin. † $p < 0.05$  versus the static group with 0  $\mu\text{g/ml}$  doxorubicin.

**Supplemental Figure 4. Mechanical strain does not induce changes in multidrug resistance protein activity in MDA-MB-231 breast cancer cells.** MDA-MB-231 breast cancer cells were mechanically strained for 24 hours at 0 or 7.5% strain. The cells were then tested for activity of multidrug resistance proteins MDR1, MRP1, and BCRP. Flow cytometry histogram of cell counts for gold dye intensity in (A) statically cultured cells and (B) cells conditioned with 7.5% cyclic mechanical strain. Increasing presence of multidrug resistance efflux pumps would decrease concentration of gold dye inside the cell. (C) Multidrug resistance activity factor was calculated to determine the influence of three multidrug resistance efflux pumps, multidrug resistance protein 1 (MDR1), MDR-associated protein (MRP1), and breast cancer resistance protein (BCRP).

**Supplemental Figure 5. Immunoblotting for signaling pathway activation by mechanical load.** MDA-MB-231 were treated with 7.5% cyclic strain for the time indicated, lysed and immunoblotted for the signaling pathway activation.

**Supplemental Figure 6. Full western blot gels utilized in Supplemental Figure 5.** MDA-MB-231 were treated with 7.5% cyclic strain for the time indicated, lysed and immunoblotted for the signaling pathway activation.

**Supplemental Figure 7. Full western blot gels utilized in Figure 2E.** Experimental groups are, starting from left to right, static cells treated with DMSO, asciminib, radotinib, AZD1480, ruxolitinib and PI3K inhibitor followed by the cells treated with 7.5% strain DMSO, asciminib, radotinib, AZD1480, ruxolitinib, and PI3K inhibitor.

**Supplemental Figure 8. Full western blot gels utilized in Figure 2F.** Experimental groups are, starting from left to right, static cells treated with DMSO, asciminib, radotinib, AZD1480, ruxolitinib and PI3K inhibitor followed by the cells treated with 7.5% strain DMSO, asciminib, radotinib, AZD1480, ruxolitinib, and PI3K inhibitor.

**Supplemental Figure 9. Summary diagram of mechanisms inferred by studies on mechanically induced enhancement in cell survival and chemoresistance.**

**Supplemental Figure 10. Mechanical strain increases adhesion of MCF-7 cells to endothelial cells and specific ECM.** MCF-7 cells were mechanically loaded for 24 hours at 7.5% strain at 1 Hz. Initial adhesion of strained cells under 0.5 dynes/cm<sup>2</sup> shear stress to a endothelial monolayer with or without pre-treatment with TNF- $\alpha$  or to ECM coated plates. \* $p < 0.05$  compared to the static group (n = 7-16).

**Supplemental Figure 11. Mechanical strain increases actin stress fiber formation.** MDA-MB-231 cells were mechanically loaded for 24 hours at 7.5% strain at 1 Hz and then stained for F-actin. \* $p < 0.05$  compared to the static group (n = 5-6). Scale bar = 20  $\mu$ m.

**Supplemental Figure 12. Vasculogenic activity is increased by mechanical loading in breast cancer cells.** MDA-MB-231 cells were mechanically loaded for 24 hours at 7.5% strain at 1 Hz. (A) Endothelial cells were treated with conditioned media from mechanically loaded cancer cells in tube formation assay on matrigel. \* $p < 0.05$  versus static group. (B) MDA-MB-231 cells were treated with mechanical load and then used directly in a tube formation assay on matrigel. \* $p < 0.05$  versus static group.

**Supplemental Figure 13. Full western blot gels utilized in Figure 5E.** Experimental groups are, starting from left to right, static cells treated with just cell media, DMSO, Lck inhibitor, PI3K inhibitor, Syk inhibitor, and Yap inhibitor (Vert; verteporfin), followed by the cells treated with 7.5% strain cell media, DMSO, Lck inhibitor, PI3K inhibitor, Syk inhibitor, and Yap inhibitor (Vert).

**Supplemental Figure 14. Full western blot gels utilized in Figure 5F.** Experimental groups are, starting from left to right, static cells treated with just cell media, DMSO, Lck inhibitor, PI3K inhibitor, Syk inhibitor, and Yap inhibitor (Vert; verteporfin), followed by the cells treated with 7.5% strain cell media, DMSO, Lck inhibitor, PI3K inhibitor, Syk inhibitor, and Yap inhibitor (Vert).

**Supplemental Figure 15. Full western blot gels utilized in Figure 5G.** Experimental groups are, starting from left to right, static cells treated with just cell media, DMSO, Lck inhibitor, PI3K inhibitor, Syk inhibitor, and Yap inhibitor (Vert; verteporfin), followed by the cells treated with 7.5% strain cell media, DMSO, Lck inhibitor, PI3K inhibitor, Syk inhibitor, and Yap inhibitor (Vert).

**Supplemental Figure 16. Full western blot gels utilized in Figure 5H.** Experimental groups are, starting from left to right, static cells treated with just cell media, DMSO, Lck inhibitor, PI3K inhibitor, Syk inhibitor, and Yap inhibitor (Vert; verteporfin), followed by the cells treated with 7.5% strain cell media, DMSO, Lck inhibitor, PI3K inhibitor, Syk inhibitor, and Yap inhibitor (Vert).

**Supplemental Figure 17. Full western blot gels utilized in Figure 5I.** Experimental groups are, starting from left to right, static cells treated with just cell media, DMSO, Lck inhibitor, PI3K inhibitor, Syk inhibitor, and Yap inhibitor (Vert; verteporfin), followed by the cells treated with 7.5% strain cell media, DMSO, Lck inhibitor, PI3K inhibitor, Syk inhibitor, and Yap inhibitor (Vert).

**Supplemental Figure 18. Full western blot gels utilized in Figure 5J.** Experimental groups are, starting from left to right, static cells treated with just cell media, DMSO, Lck inhibitor, PI3K inhibitor, Syk inhibitor, and Yap inhibitor (Vert; verteporfin), followed by the cells treated with 7.5% strain cell media, DMSO, Lck inhibitor, PI3K inhibitor, Syk inhibitor, and Yap inhibitor (Vert).

**Supplemental Figure 19. Tumor volumes for orthotopic implantation study.** (A) Tumor volumes for tumors at three days. (B) Full time course of tumor volumes for the study.

**Supplemental Figure 20. Tumor weights for excised tumors from the orthotopic implantation study.**

**Supplemental Figure 21. Laser speckle imaging for late time point in orthotopic tumor model.** MDA-MB-231 cells were treated with mechanical load for 24 hours and then injected into the mammary fat pad of nu/nu mice. (A) Laser speckle images of the mice following treatment. The dashed circles illustrate the location of the mammary fat pad. The right mammary fat pad received the injection and the left served as a contralateral control. (B) Quantification of the relative perfusion of the injected fat pad to the non-injected fat pad.

**Supplemental Figure 22. Micro-CT images of the skulls from mice injected with MDA-MB-231 cells grown under static conditions or 7.5% strain for 24 hours.**

# Supplemental Figure 1

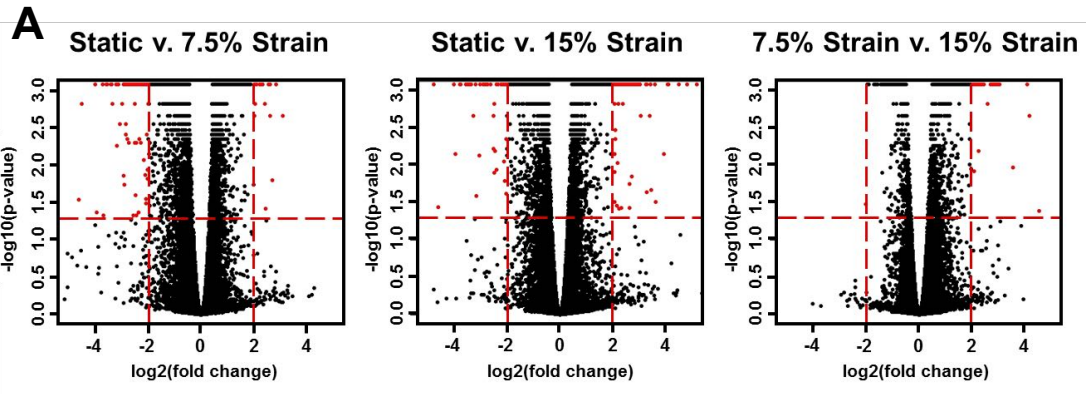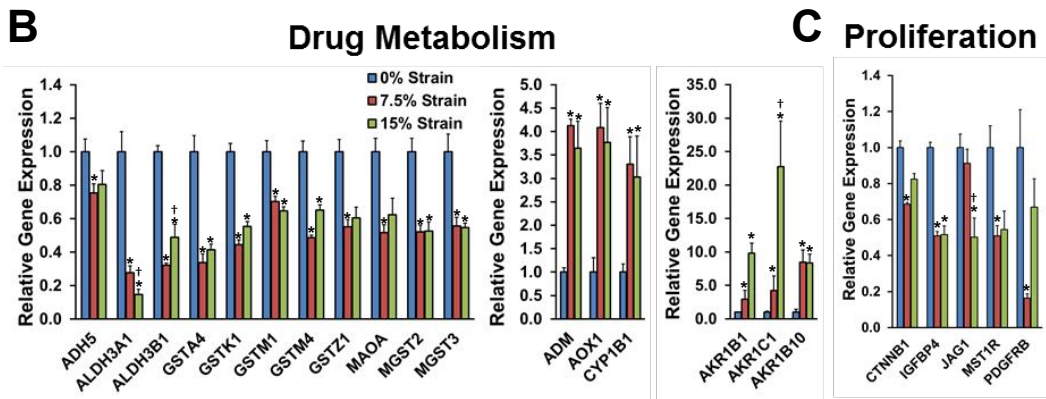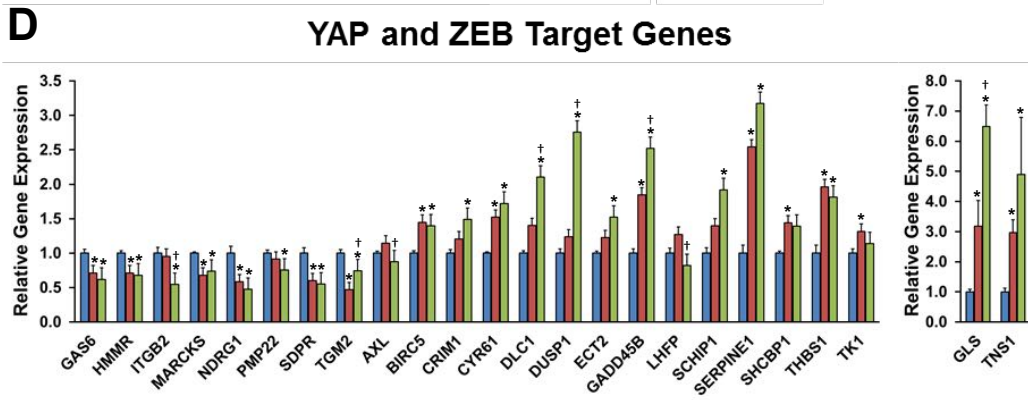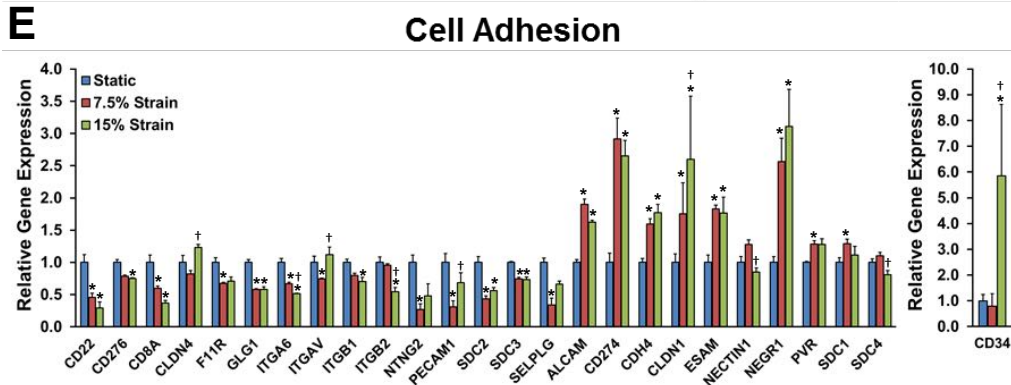

Supplemental Figure 2

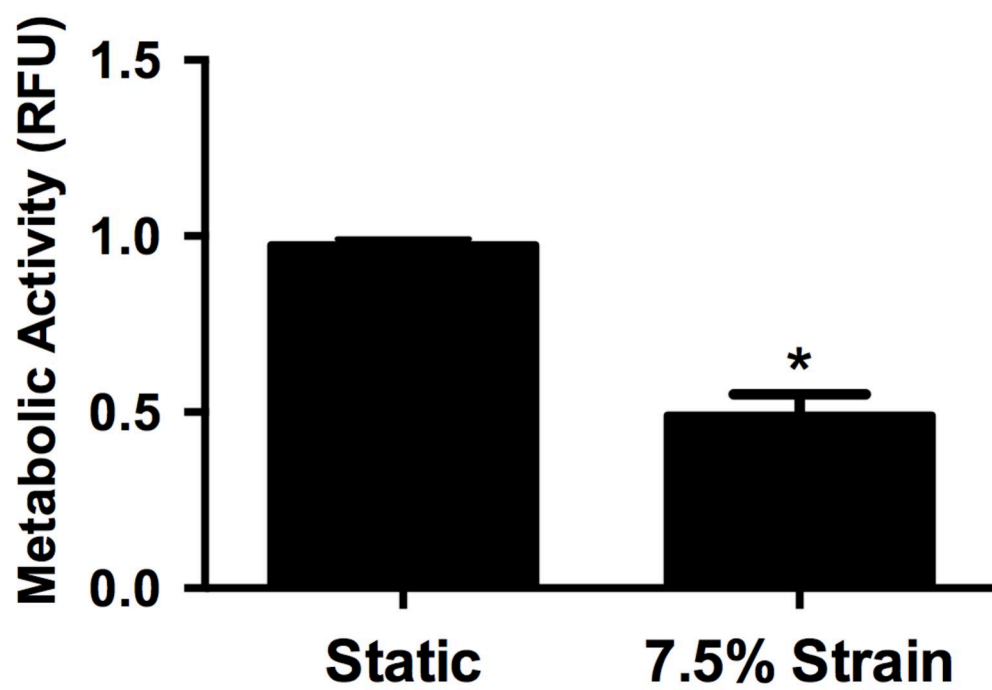

Supplemental Figure 3

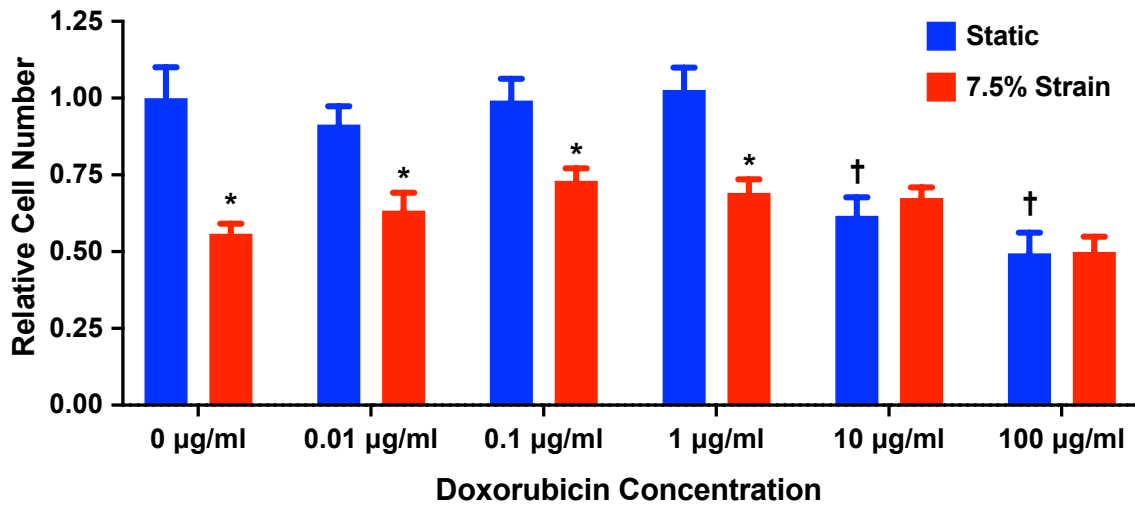



### Supplemental Figure 4

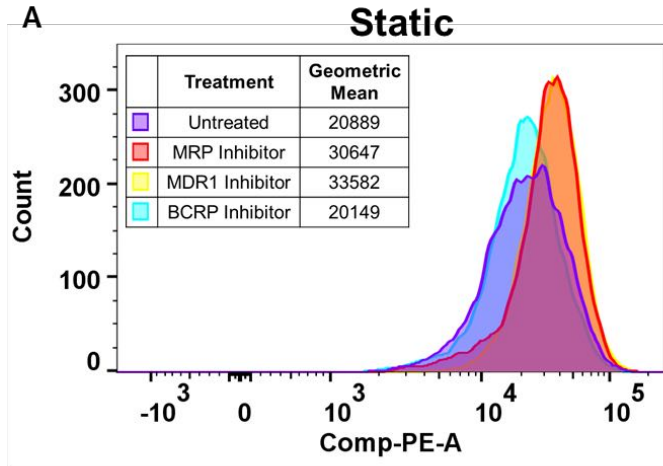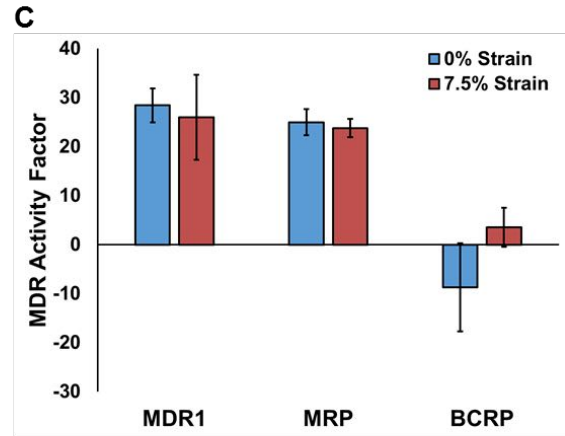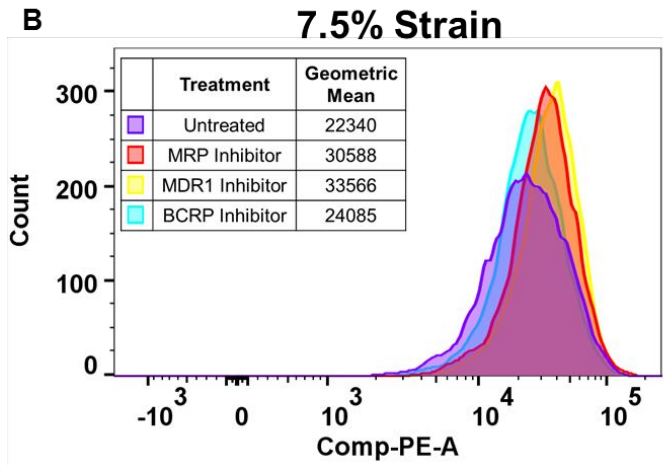

## Supplemental Figure 5

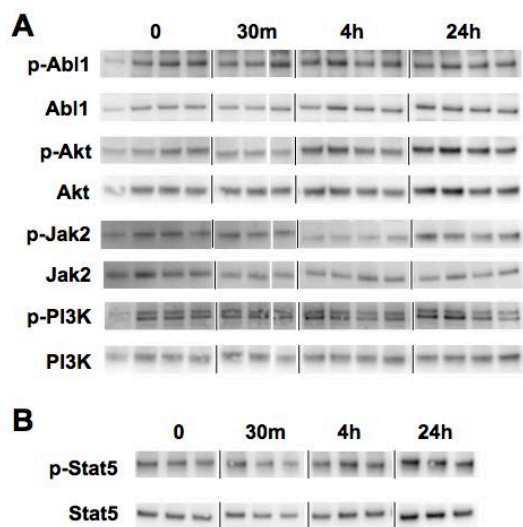

# Supplemental Figure 6

**Abl1**

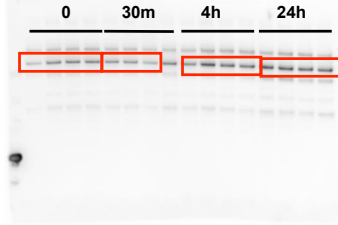

**Akt**

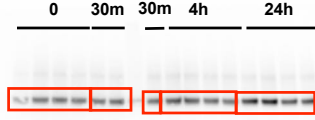

**Jak2**

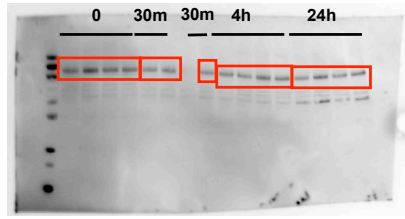

**P-Abl1**

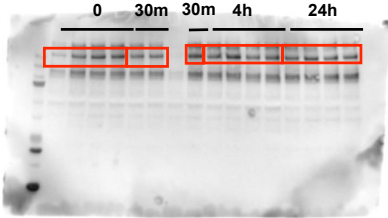

**P-Akt**

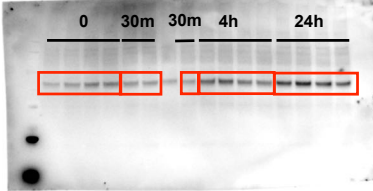

**P-Jak2**

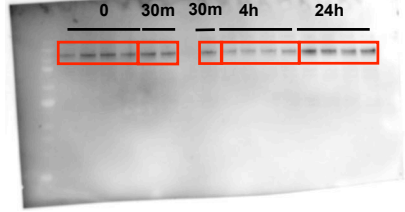

**PI3K**

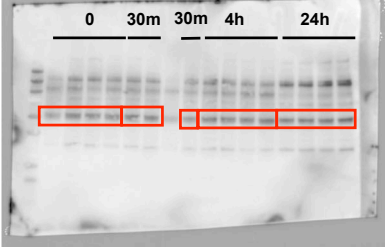

**Stat5**

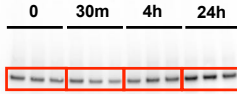

**P-PI3K**

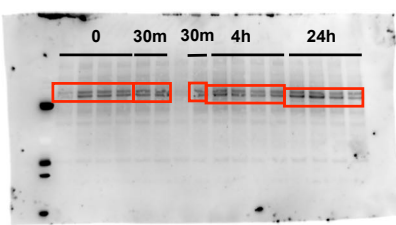

**P-Stat5**

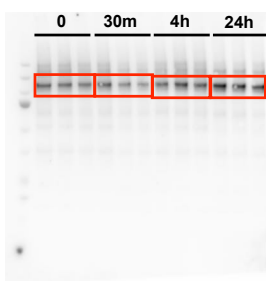

# Supplemental Figure 7

## P-Bcl-xL

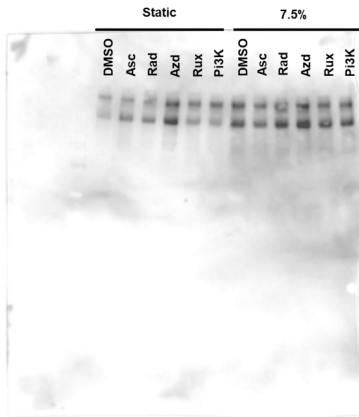

## Bcl-xL

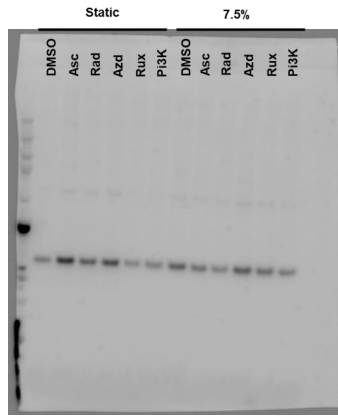

## P-p85 S6K/P-p70 S6K

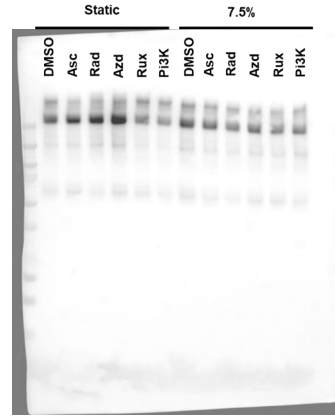

## p70 S6K

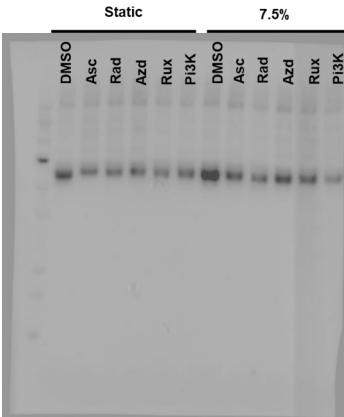

## P-Mcl

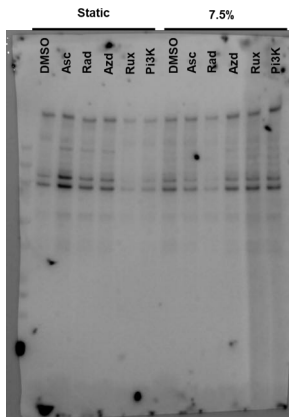

## Mcl

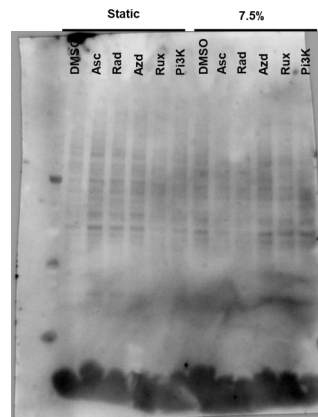

## GAPDH

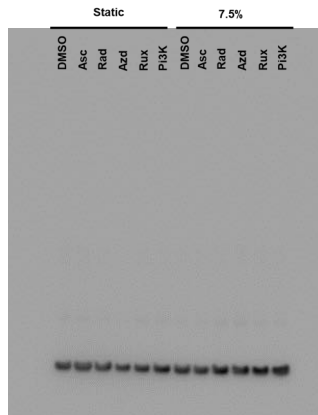

# Supplemental Figure 8

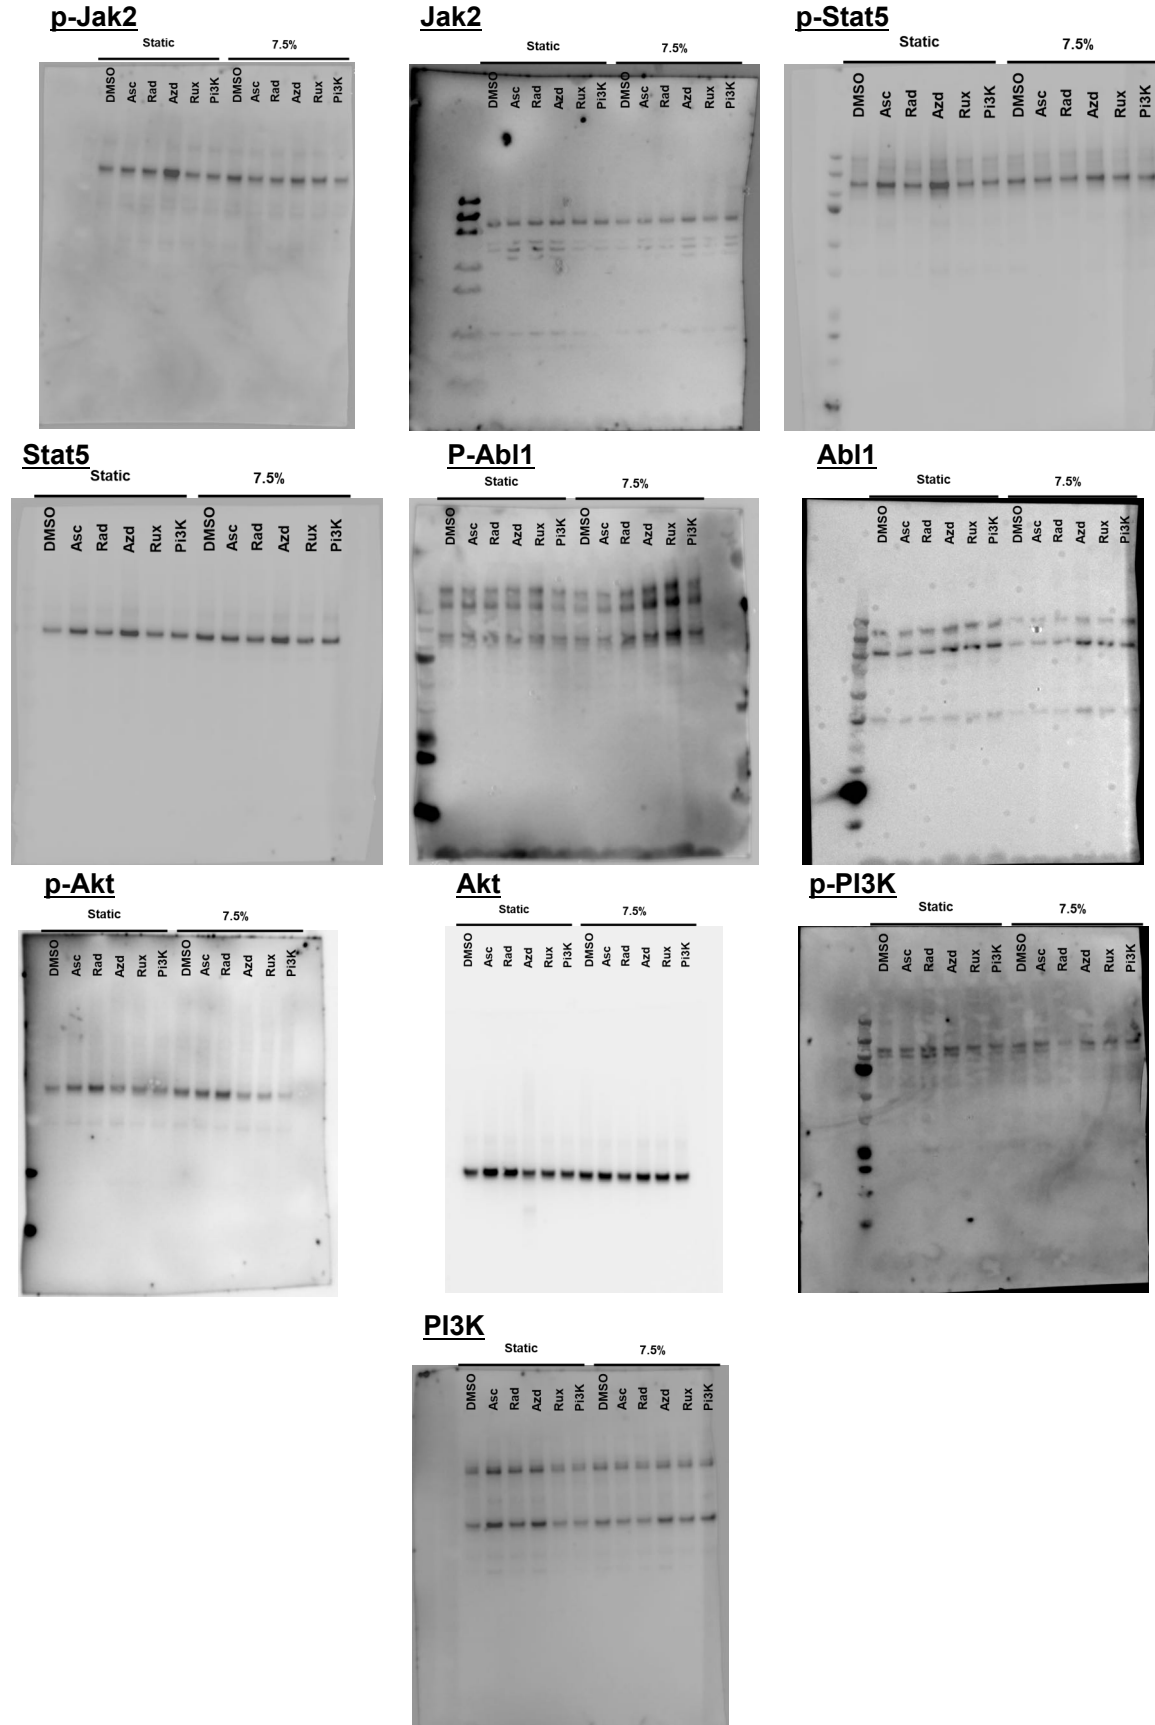

Supplemental Figure 9

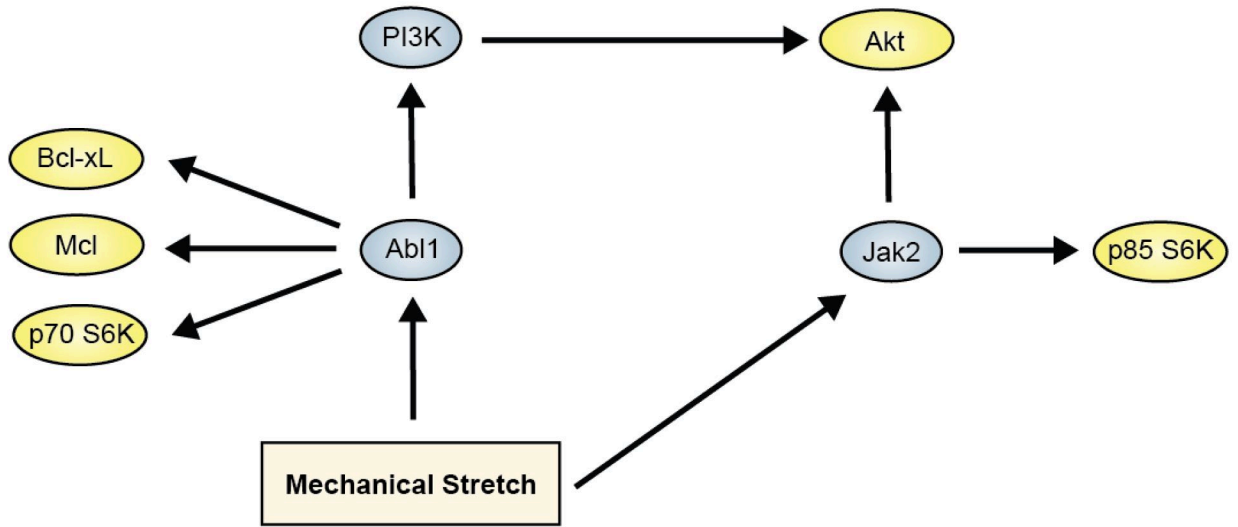

Supplemental Figure 10

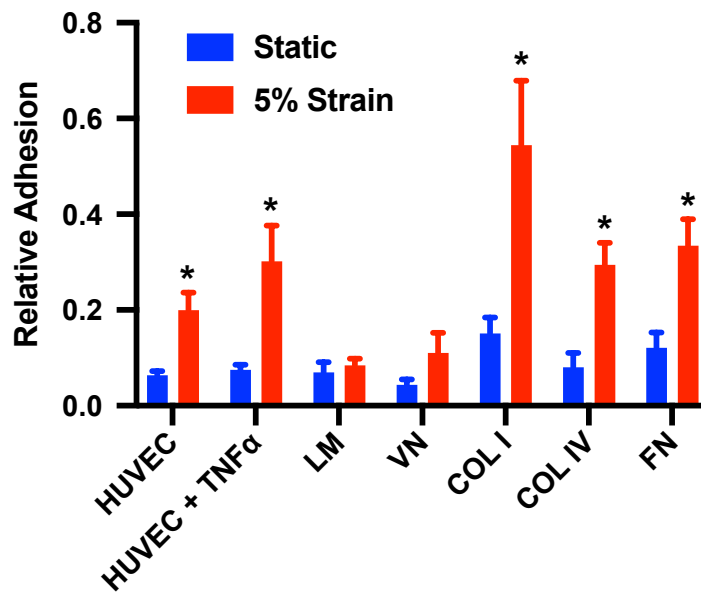

# Supplemental Figure 11

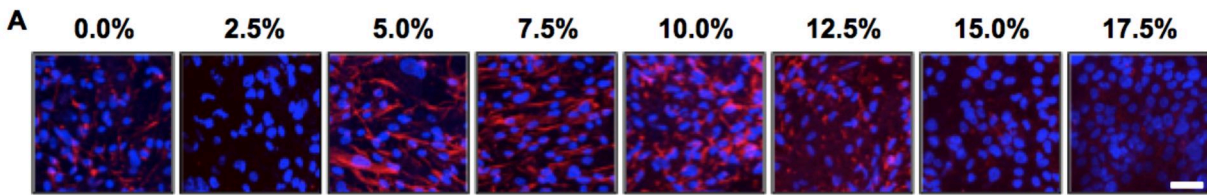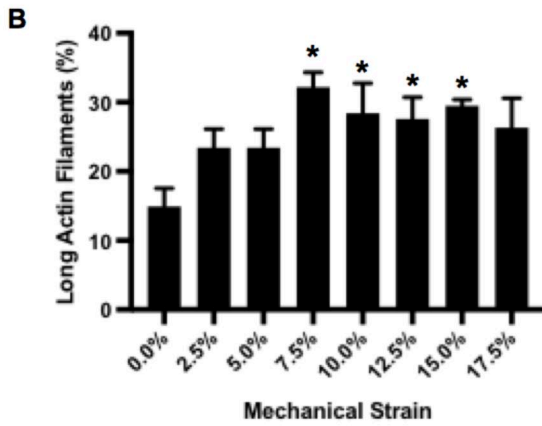



Supplemental Figure 12

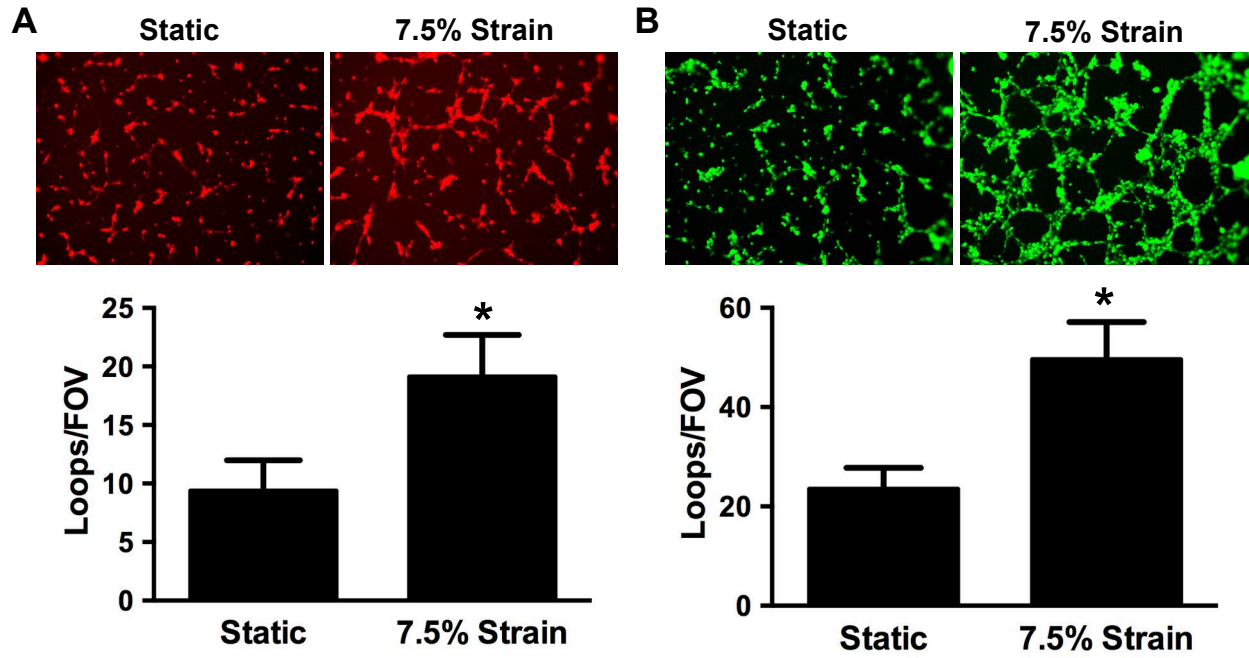

# Supplemental Figure 13

## P-YAP

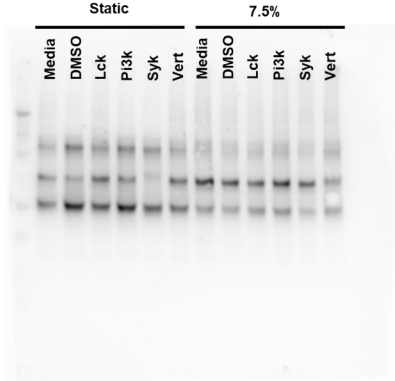

## YAP

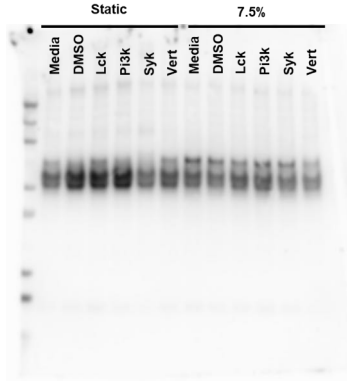

## p-Smad2

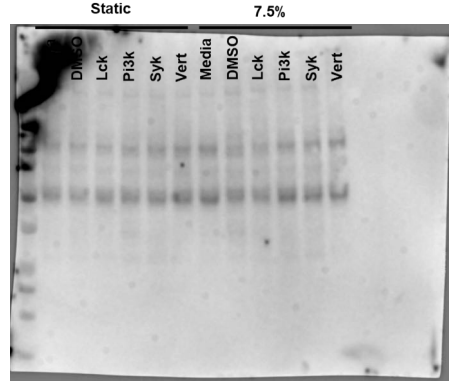

## P-Smad3

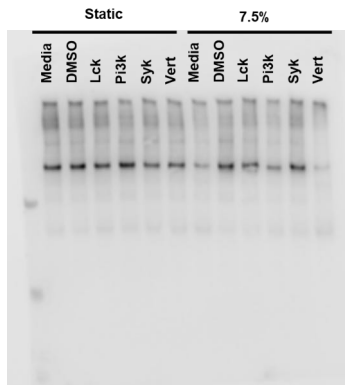

## Smad2/3

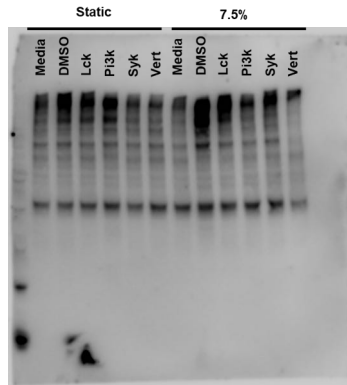

## Supplemental Figure 14

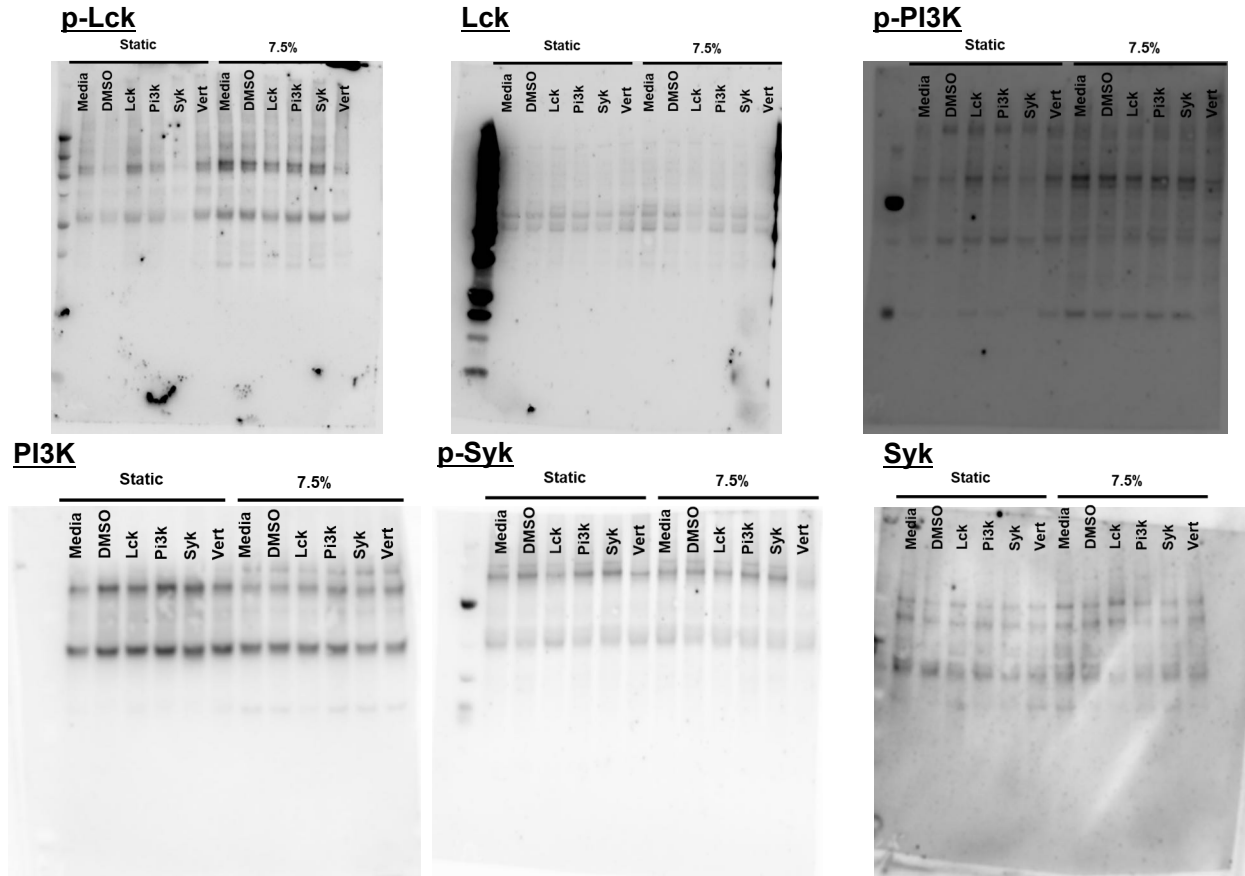

# Supplemental Figure 15

## P-Jak1

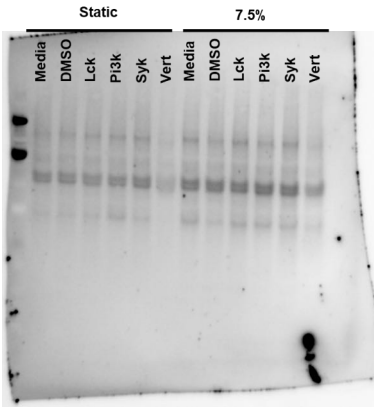

## Jak1

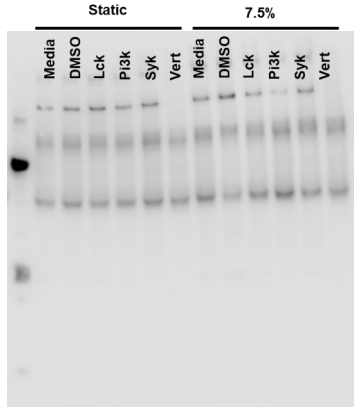

## P-Jak2

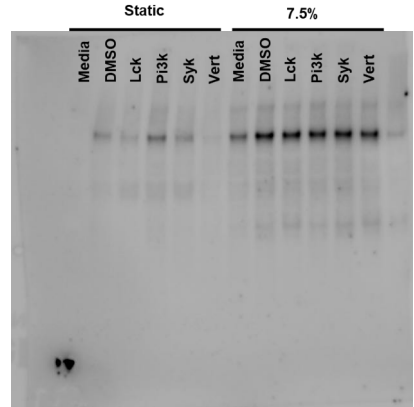

## Jak2

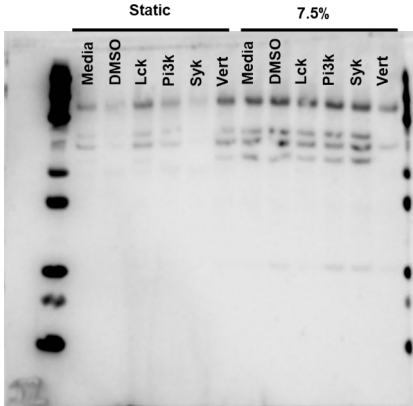

## P-Jak3

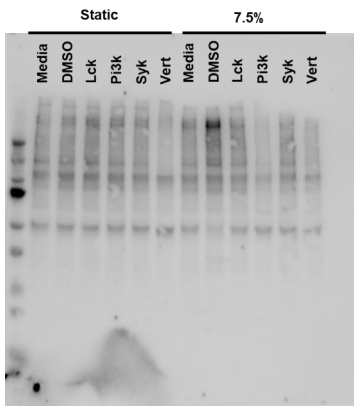

## Jak3

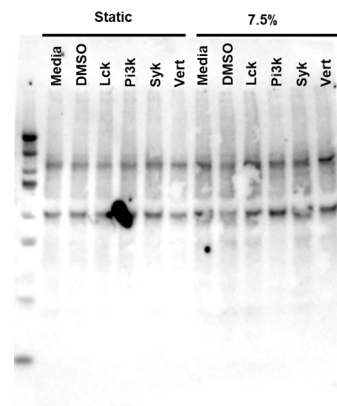

## GAPDH

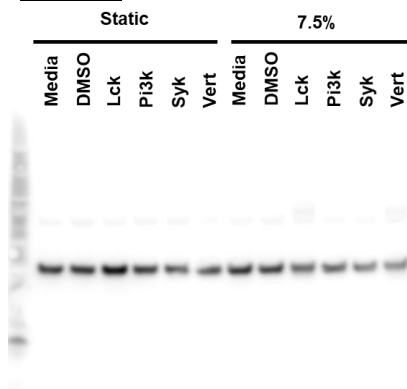

# Supplemental Figure 16

## P-Src

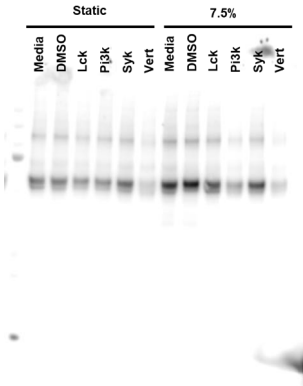

## Src

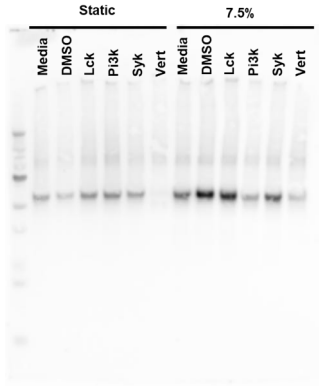

## P-PKCζ

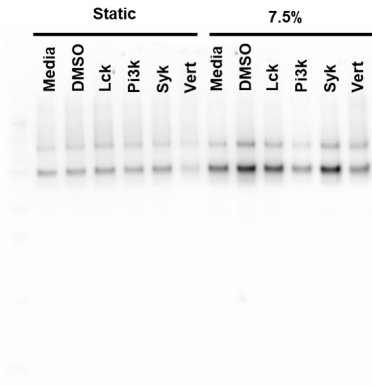

## PKC

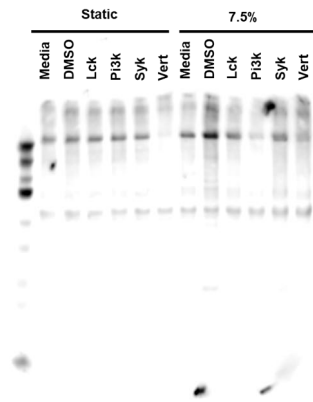

## P-ERK1/2

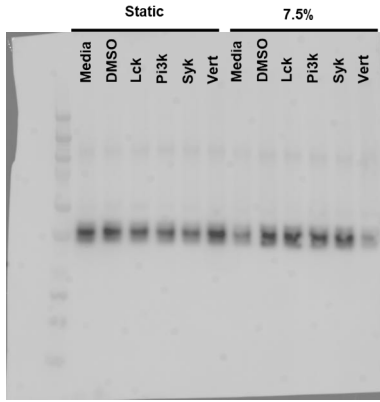

## ERK1/2

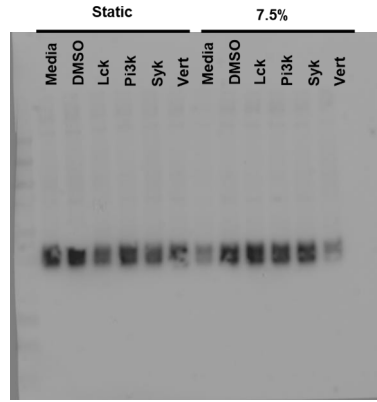

## Supplemental Figure 17

### GLG1

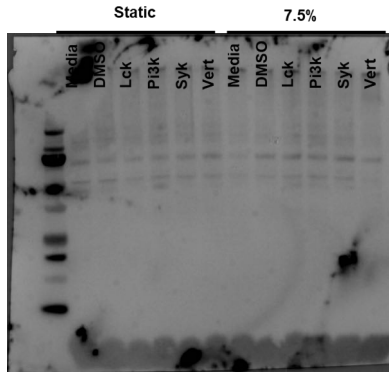

### CD44

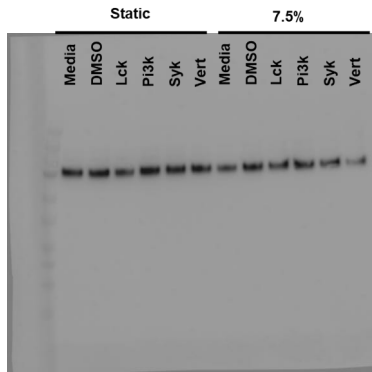

### Int $\beta$ 1

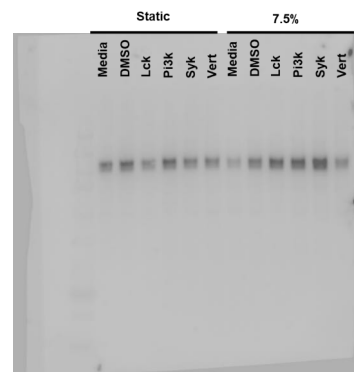

### CD11a

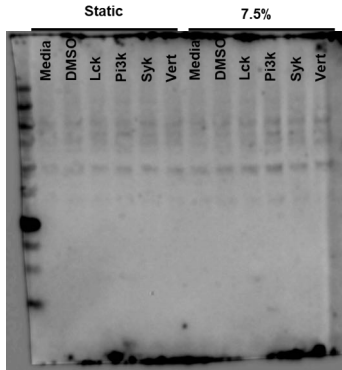

### CD162

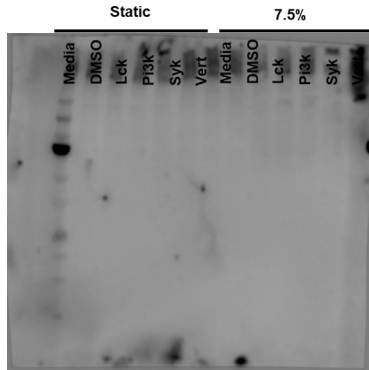

### SDC1

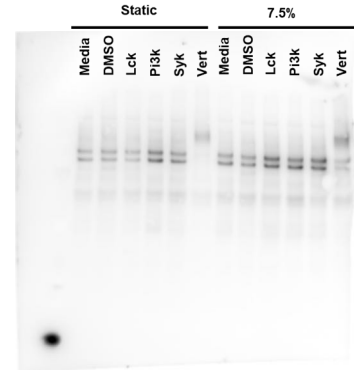

## Supplemental Figure 18

### Cytokeratin

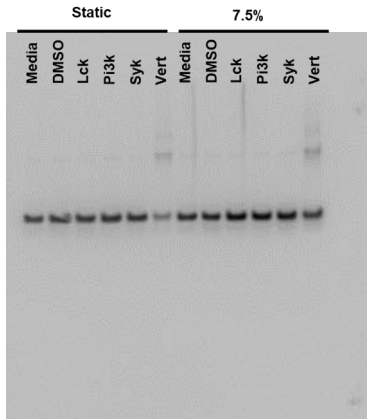

### Mucin 1

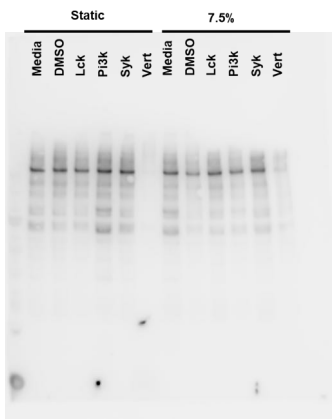

### E-Cadherin

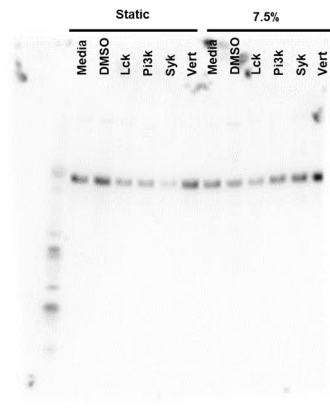

### N-Cadherin

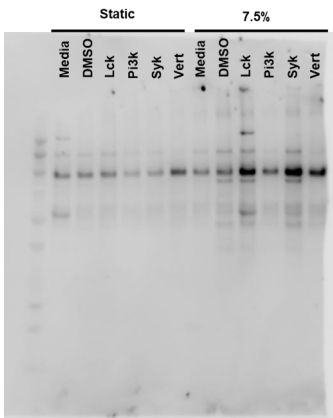

### Vimentin

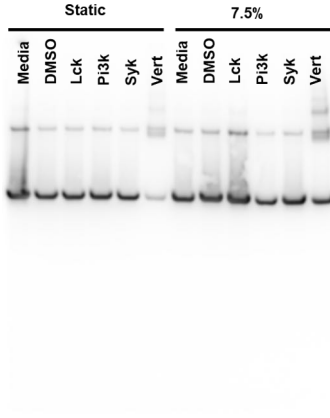

### Zeb 1

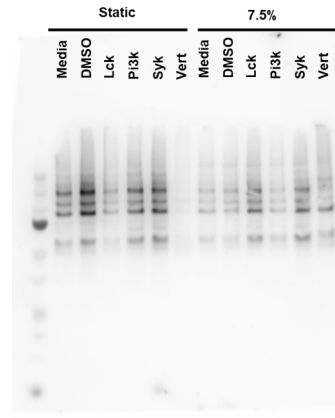

### Snail

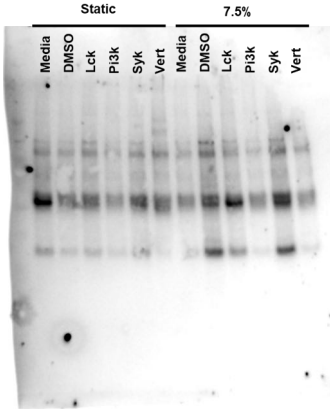

### Twist 1

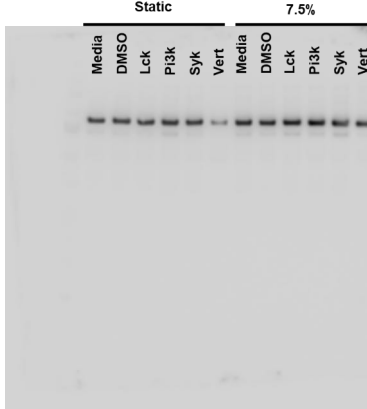

### Slug

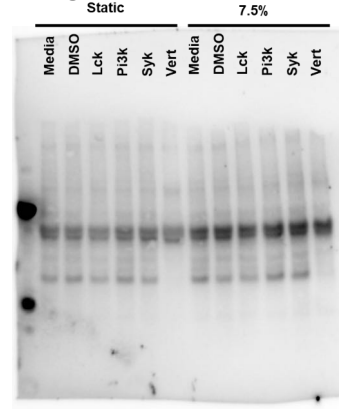

Supplemental Figure 19

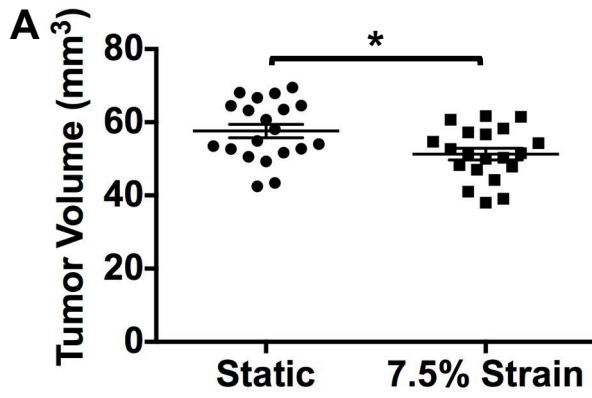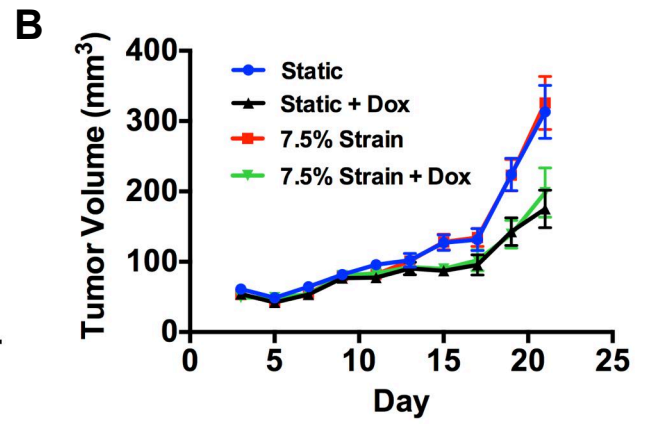



Supplemental Figure 20

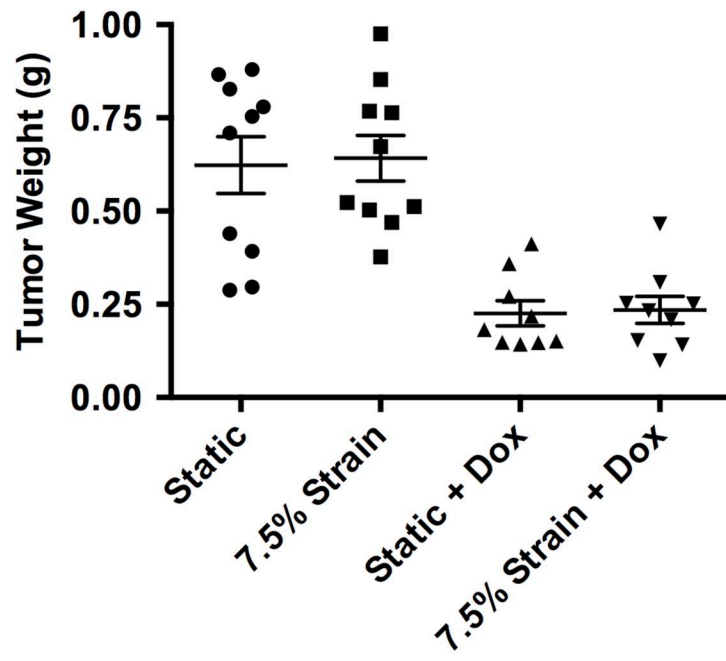

Supplemental Figure 21

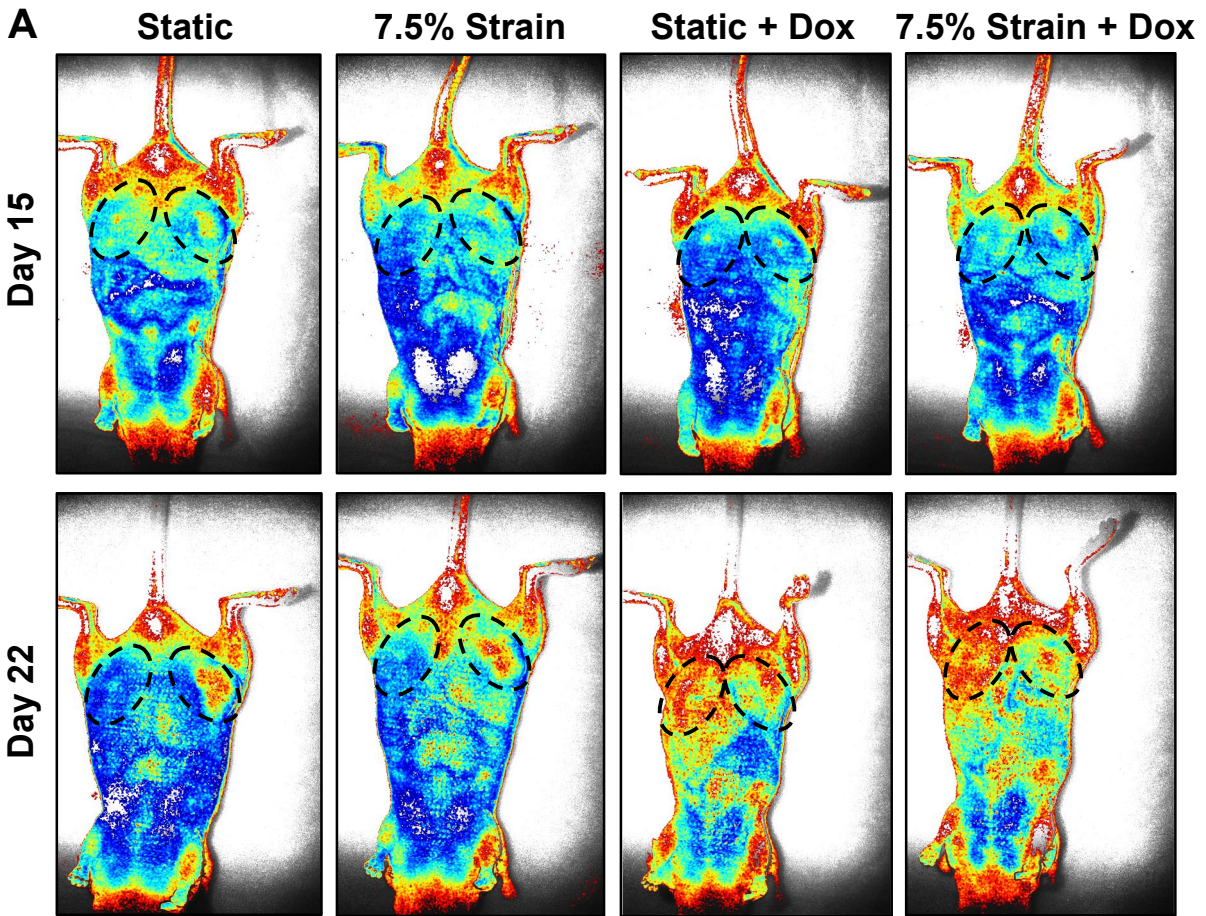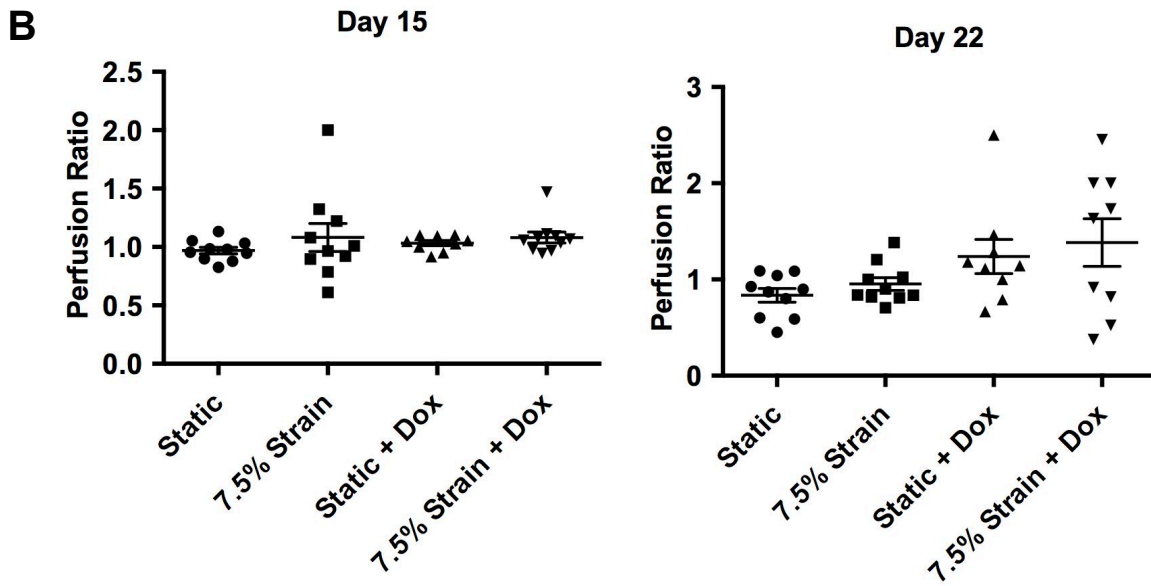

Supplemental Figure 22

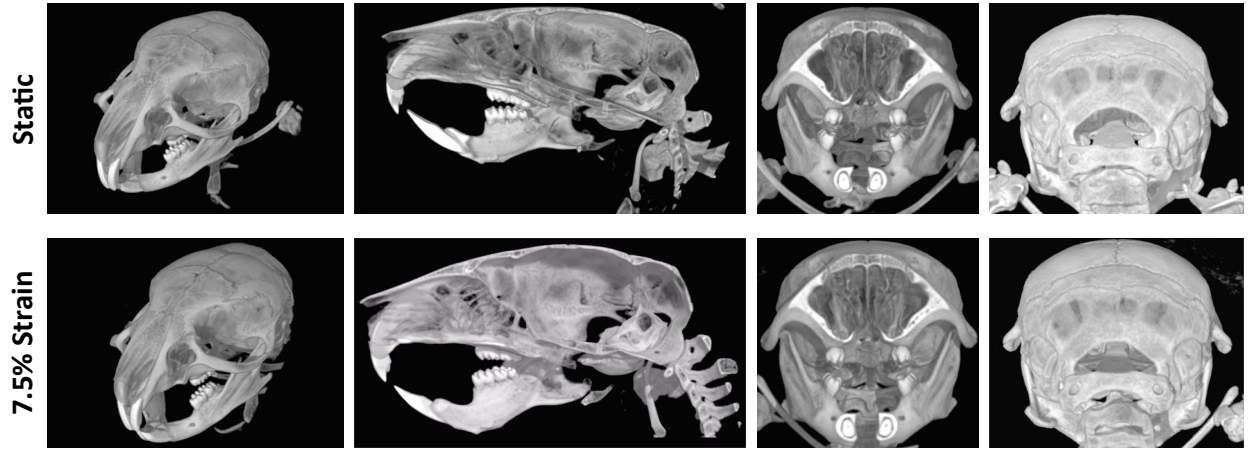

## Supplemental Tables

**Supplemental Table 1. *Integrin inhibitors Used in the Study.***

| <b>Drug</b> | <b>Target</b>                           |
|-------------|-----------------------------------------|
| ATN-161     | $\alpha 5\beta 1$                       |
| BIO-1211    | $\alpha 4\beta 1$                       |
| Cilengitide | $\alpha v\beta 3$ and $\alpha v\beta 5$ |
| Obtustatin  | $\alpha 1\beta 1$                       |
| P11         | $\alpha 5\beta 1$ /vitronectin          |
| PF-562271   | FAK                                     |
| RGDS        | Pan-integrin                            |
| TC-I 15     | $\alpha 5\beta 1$                       |

**Supplemental Table 2. Primary Antibodies/Reagents Used for Immunostaining**

| <b>Target Protein</b> | <b>Company</b>           | <b>Catalog #</b> | <b>Species/Isotype</b> | <b>Dilution Ratio</b> |
|-----------------------|--------------------------|------------------|------------------------|-----------------------|
| AF 594 Phalloidin     | Invitrogen               | A12381           | N/A                    | 1:250                 |
| Paxillin              | Santa Cruz Biotechnology | sc-5574          | anti-rabbit            | 1:50                  |
| PECAM-1               | Cell Signaling           | 3528S            | anti-mouse             | 1:100                 |
| $\alpha$ -SMA         | Abcam                    | ab21027          | anti-rabbit            | 1:100                 |
| ILK                   | BD Biosciences           | 611803           | anti-mouse             | 1:100                 |
| Yap/Taz               | Cell Signaling           | 8418S            | anti-rabbit            | 1:100                 |
| 14-3-3 $\epsilon$     | Santa Cruz Biotechnology | sc393177         | anti-mouse             | 1:50                  |
| Smad 2/3              | BD Biosciences           | 610842           | anti-mouse             | 1:100                 |
| Phospho-Smad2/3       | Cell Signaling           | 8828S            | anti-rabbit            | 1:100                 |
| vWF                   | Santa Cruz Biotechnology | 365712           | anti-mouse             | 1:50                  |
| Myosin IIb            | Cell Signaling           | 3404             | anti-rabbit            | 1:100                 |
| Sca-1                 | Santa Cruz Biotechnology | sc-365343        | anti-mouse             | 1:50                  |
| Oct-4                 | Cell Signaling           | 2750             | anti-rabbit            | 1:100                 |

**Supplemental Table 3. Antibodies Used in the Studies.**

| <b>Target</b>              | <b>Dilution</b> | <b>Product #</b> | <b>Supplier</b>           | <b>Method</b>  |
|----------------------------|-----------------|------------------|---------------------------|----------------|
| <b>14-3-3ε</b>             | 1:50            | sc-393177        | Santa Cruz Biotechnology  | ICC            |
| <b>Abl</b>                 | 1:250           | ab15130          | Abcam                     | WB             |
| <b>Akt</b>                 | 1:250           | 4685             | Cell Signaling Technology | WB             |
| <b>Bax</b>                 | 1:100           | ab53154          | Abcam                     | ICC            |
| <b>Bcl-2</b>               | 1:50            | sc-7382          | Santa Cruz Biotechnology  | ICC            |
| <b>Bcl-xl</b>              | 1:250           | 2762             | Cell Signaling Technology | WB             |
| <b>CD11a</b>               | 1:250           | ab52895          | Abcam                     | WB             |
| <b>CD162</b>               | 1:250           | MAB996           | R&D Systems               | WB             |
| <b>CD166</b>               | 1:20            | 562936           | BD Biosciences            | Flow Cytometry |
| <b>CD274</b>               | 1:20            | 563742           | BD Biosciences            | Flow Cytometry |
| <b>CD29</b>                | 1:20            | 743786           | BD Biosciences            | Flow Cytometry |
| <b>CD325</b>               | 1:20            | 563434           | BD Biosciences            | Flow Cytometry |
| <b>CD44</b>                | 1:20            | 744271           | BD Biosciences            | Flow Cytometry |
| <b>CD44</b>                | 1:250           | 37259            | Cell Signaling Technology | WB             |
| <b>CD51/CD61</b>           | 1:20            | 744088           | BD Biosciences            | Flow Cytometry |
| <b>Claudin-1</b>           | 1:20            | FAB4618R         | R&D Systems               | Flow Cytometry |
| <b>Cyclin D1</b>           | 1:250           | 2978             | Cell Signaling Technology | WB             |
| <b>E-Cadherin</b>          | 1:50            | sc-7870          | Santa Cruz Biotechnology  | ICC. WB        |
| <b>E-Cadherin</b>          | 1:20            | FAB18381G        | R&D Systems               | Flow Cytometry |
| <b>Erk</b>                 | 1:250           | 9102             | Cell Signaling Technology | WB             |
| <b>ESAM</b>                | 1:20            | FAB4204G         | R&D Systems               | Flow Cytometry |
| <b>GAPDH</b>               | 1:500           | 2118             | Cell Signaling Technology | WB             |
| <b>GLG1</b>                | 1:250           | PA528987         | Thermo Fisher Scientific  | WB             |
| <b>Hamster IgG HRP</b>     | 1:3500          | PA132045         | Thermo Fisher Scientific  | WB             |
| <b>Int β1</b>              | 1:250           | 4706             | Cell Signaling Technology | WB             |
| <b>Jak1</b>                | 1:250           | 3332             | Cell Signaling Technology | WB             |
| <b>Jak2</b>                | 1:250           | 3230             | Cell Signaling Technology | WB             |
| <b>Jak3</b>                | 1:250           | 3775             | Cell Signaling Technology | WB             |
| <b>Ki-67</b>               | 1:100           | 9449S            | Cell Signaling Technology | ICC            |
| <b>Lck</b>                 | 1:250           | 2752             | Cell Signaling Technology | WB             |
| <b>Mcl</b>                 | 1:250           | 4572             | Cell Signaling Technology | WB             |
| <b>Mouse IgG Alexa 594</b> | 1:500           | ab150108         | Abcam                     | ICC            |
| <b>Mouse IgG HRP</b>       | 1:3500          | sc-2318          | Santa Cruz Biotechnology  | WB             |
| <b>Mouse IgG HRP</b>       | 1:3500          | AP192P           | EMD Millipore             | WB             |
| <b>N-Cadherin</b>          | 1:100           | sc-7939          | Santa Cruz Biotechnology  | ICC. WB        |
| <b>p70 S6k</b>             | 1:250           | 2708             | Cell Signaling Technology | WB             |
| <b>pAbl1</b>               | 1:250           | ab4717           | Abcam                     | WB             |
| <b>pAkt</b>                | 1:250           | 9271             | Cell Signaling Technology | WB             |
| <b>pBcl-xl</b>             | 1:250           | 44428G           | Thermo Fisher Scientific  | WB             |
| <b>pCyclin D1</b>          | 1:250           | 3300             | Cell Signaling Technology | WB             |
| <b>pErk</b>                | 1:250           | 9101             | Cell Signaling Technology | WB             |
| <b>Pi3k</b>                | 1:250           | 11889            | Cell Signaling Technology | WB             |
| <b>pJak1</b>               | 1:250           | 3331             | Cell Signaling Technology | WB             |
| <b>pJak2</b>               | 1:250           | 3771             | Cell Signaling Technology | WB             |

|                       |        |           |                           |         |
|-----------------------|--------|-----------|---------------------------|---------|
| <b>pJak3</b>          | 1:250  | 5031      | Cell Signaling Technology | WB      |
| <b>PKC</b>            | 1:250  | PA536757  | Thermo Fisher Scientific  | WB      |
| <b>pLck</b>           | 1:250  | 2751      | Cell Signaling Technology | WB      |
| <b>pMcl</b>           | 1:250  | 4579      | Cell Signaling Technology | WB      |
| <b>pp70/p85 S6k</b>   | 1:250  | 9204      | Cell Signaling Technology | WB      |
| <b>pPi3k</b>          | 1:250  | 4228      | Cell Signaling Technology | WB      |
| <b>pPKCζ</b>          | 1:250  | 2060      | Cell Signaling Technology | WB      |
| <b>pSmad2</b>         | 1:250  | 3108      | Cell Signaling Technology | WB      |
| <b>pSmad2/3</b>       | 1:100  | 8828      | Cell Signaling Technology | ICC. WB |
| <b>pSmad3</b>         | 1:250  | 9520      | Cell Signaling Technology | WB      |
| <b>pSrc</b>           | 1:250  | 2101      | Cell Signaling Technology | WB      |
| <b>pSyk</b>           | 1:250  | 2711      | Cell Signaling Technology | WB      |
| <b>pYap</b>           | 1:250  | 13008     | Cell Signaling Technology | WB      |
| <b>Rabbit IgG 488</b> | 1:500  | ab150073  | Abcam                     | ICC     |
| <b>Rabbit IgG HRP</b> | 1:3500 | A16104    | Thermo Fisher Scientific  | WB      |
| <b>Rabbit IgG HRP</b> | 1:3500 | sc-2077   | Santa Cruz Biotechnology  | WB      |
| <b>Slug</b>           | 1:100  | 9585S     | Cell Signaling Technology | ICC. WB |
| <b>Smad2/3</b>        | 1:50   | sc-133098 | Santa Cruz Biotechnology  | ICC. WB |
| <b>Smad2/3</b>        | 1:250  | 3102      | Cell Signaling Technology | WB      |
| <b>Snail-1</b>        | 1:100  | sc-271977 | Santa Cruz Biotechnology  | ICC. WB |
| <b>Src</b>            | 1:250  | 2108      | Cell Signaling Technology | WB      |
| <b>Syk</b>            | 1:250  | 2712      | Cell Signaling Technology | WB      |
| <b>Syndecan-1</b>     | 1:250  | 12922     | Cell Signaling Technology | WB      |
| <b>VE-Cadherin</b>    | 1:100  | AF1002    | R&D Systems               | ICC. WB |
| <b>Vimentin</b>       | 1:50   | sc-5565   | Santa Cruz Biotechnology  | ICC. WB |
| <b>vWF</b>            | 1:100  | sc-365712 | Santa Cruz Biotechnology  | ICC. WB |
| <b>Yap/Taz</b>        | 1:100  | 8418S     | Cell Signaling Technology | ICC     |
| <b>Yap/Taz</b>        | 1:250  | 4912      | Cell Signaling Technology | WB      |
| <b>α-SMA</b>          | 1:100  | ab5694    | Abcam                     | ICC. WB |
| <b>β-Catenin</b>      | 1:50   | sc-7199   | Santa Cruz Biotechnology  | ICC. WB |
